# 1 No pervasive size trend in global community 2 dynamics.

3 J. Christopher D. Terry<sup>1\*</sup> 0000-0002-0626-9938

4 Jacob D. O'Sullivan<sup>1</sup> 0000-0003-2386-6635

5 Axel G. Rossberg<sup>1</sup> 0000-0001-9014-3176

6 1: School of Biological and Chemical Sciences, Queen Mary University of London, London, UK

7 \* Corresponding Author – c.terry@qmul.ac.uk

8 **While recent meta- analyses have suggested that local taxonomic richness has on average remained**  
9 **invariant, potential shifts in functional traits remain underexplored at global scales. Here, by linking the**  
10 **largest cross-taxa community time series database to multiple trait databases, we show that within**  
11 **communities there is no clear trend between size traits and changes in abundance rank over time. This**  
12 **suggests that there is no pervasive tendency across biomes for larger species to be doing proportionally**  
13 **better or worse than smaller species.**

14 Recent analyses have found that despite high and increasing levels of community turnover, there is no clear  
15 overall trend in the local-scale species richness<sup>1-4</sup>. However, it remains unclear how this result translates into  
16 functional changes. One of the most fundamental functional traits of a species is its size<sup>5,6</sup> and there is an  
17 expectation that a warming climate is will likely favour smaller bodysizes<sup>7,8</sup>. Further, larger species have been  
18 more extinction prone during some previous mass-extinctions<sup>9,10</sup>, are more likely to show strong recent  
19 population declines<sup>11</sup>, and (although relationships are threat-dependent) tend to be assessed at a higher risk of  
20 extinction<sup>12</sup> due to longer generational intervals and increased threat from habitat fragmentation and  
21 hunting<sup>13</sup>.

22 One might therefore expect a detectable signal of shifts in community trait values beneath the apparent  
23 underlying consistency in taxonomic diversity. To examine this, we tested whether the body size of a species is  
24 correlated to a relative change in abundance through time using the publicly available BioTIME database<sup>14</sup>.  
25 This database is the largest collection of time series of ecological communities and has wide geographic and  
26 taxonomic scope<sup>14</sup>. After cleaning and standardising the names associated with the records, we linked six  
27 fundamental 'size' traits from four openly accessible trait databases representing four guilds – adult body  
28 mass from a database of amniote life history traits<sup>15</sup>, adult body length and qualitative body size of marine  
29 species from the WoRMS database<sup>16</sup>, plant maximum height and seed mass from the TRY database<sup>17</sup>, and  
30 maximum body length of fish from a compilation<sup>18</sup> based on data in the FishBase repository<sup>19</sup>.

31 Observations from single-location studies were collated, while widely dispersed studies were separately  
32 binned into a global grid of cells, each approximately 10km wide, and data from each study and cell were  
33 treated as discrete assemblages, following previous analyses<sup>1,20</sup>. Selecting only assemblages with quantified  
34 observations of ≥10 species, over ≥5 years, and with ≥40% of the species having records for at least one trait,  
35 we generated 22,915 community time series from 167 studies. This filtered dataset represented 2,516,175

36 observations of 12,033 species, of which 8,238 could be linked to at least one 'size' trait (representing 84.6% of  
37 observations). Equally weighting studies, the average time series length was 17.2 years (range 5-70.5) and the  
38 average number of species per included assemblage was 56.7 (range 10-337).

39 To focus on changes within the community and mitigate the risk of issues with changing sampling intensities  
40 through time, for each trait and community assemblage time series for which there was sufficient data, we  
41 calculated ' $\tau$ ' - the Kendall rank correlation coefficient between the trait in question and change in relative-  
42 rank of the abundance of each species within the assemblage (Fig 1a). This gives a non-parametric measure of  
43 whether larger species are more or less likely than smaller species to have increased their relative rank  
44 through time and, importantly, can be calculated where trait values for only a fraction of the observed species  
45 are available. To weight each study within BioTIME equally, where there were multiple assemblages per study  
46 these were averaged to generate a  $\tau$  value for each possible study-trait combination. In order to provide a null-  
47 model against which to evaluate the statistical significance of this multistage analysis, we repeated the  
48 procedure with 100 trait randomisations per assemblage.

49 For five of the six tested size traits the distribution of study  $\tau$  values was not significantly different from the  
50 null model (Fig. 2, Extended Data Table 1). The one exceptional trait (amniote body mass) showed an overall  
51 average positive relationship between size and relative abundance trends. Possible confounding factors for the  
52 value of  $\tau$  associated with each study, namely the total span of the time series, the number of sample points,  
53 the species richness, the average trait completeness, the number of assemblages within the study, the grain of  
54 the study and the absolute latitude did not consistently predict  $\tau$  (Extended Data Figure 1, Tables 2-3).

55 These results indicate that there is not yet evidence for widely pervasive trends in a core functional trait, body  
56 size. Importantly however, this study should not be seen as a refutation of the enhanced threats faced by the  
57 very largest apex species<sup>21</sup>. Rather, against a background of considerable turnover<sup>2,3</sup> across the whole  
58 community assemblage, on average, species positions in communities are being taken up by species of  
59 comparable size. This suggests that previously identified shifts towards smaller species found in some  
60 systems<sup>7,22</sup> may not be as universal as currently expected<sup>8</sup> and aligns with the divergent changes in global  
61 body-size abundance distributions observed between mammal guilds<sup>23</sup>. However, we note that the variance in  
62  $\tau$  across the dataset was consistently larger than that generated by a null model randomising the available trait  
63 data within assemblages (Fig 2). This implies that many individual communities are experiencing significant  
64 directional change in their body size traits, rather than local stasis or indeed active regulation.

65 The overall positive association across the amniote studies could have a number of causes that would benefit  
66 from further investigation. One putative explanation is that anthropogenic dispersal limitations (generally  
67 considered to act more strongly against smaller species) may be having a greater immediate impact than  
68 climate change<sup>24</sup>. There are also indications of differences between terrestrial and marine systems. Previous  
69 work with the same datasets<sup>1,20</sup> has found greater species richness and abundance changes in marine systems  
70 than in terrestrial systems, while here we see a signal of greater trait-changes in the (largely terrestrial)  
71 amniotes. In our study, the fish lengths trait displayed a distinctive distribution of  $\tau$  (Fig 2c), with a modal peak

of studies showing small negative values, and then a tail of strongly positive relationships. This guild is also the most likely to have experienced sustained anthropogenic pressure<sup>25</sup> and many of the ‘fish’ datasets in BioTIME include data from surveys of actively fished and managed areas. Accurately quantifying marine community trends is a challenge<sup>26,27</sup>, but this distinctive pattern could be tentatively interpreted as a signal of the imposition or relaxation of anthropogenic pressure across marine systems<sup>28,29</sup>.

Our analysis necessarily sacrifices fine resolution for global scale. Although the lack of consistent study-level drivers of  $\tau$  suggests that the results are unlikely to be solely determined by biases within the BioTIME database, future work should seek to improve the scope and resolution of available data to enable more strongly parametric analyses and examine additional measures of community change. While available trait databases of amniotes and fish are carefully curated, checked and taxonomically tidy, the other databases pose more problems in terms of taxonomic matching and consistency of trait measurements. Without direct correspondence between dynamics and trait data sources, it is necessary to take traits as fixed values for each species, despite known differences in traits in time<sup>30–32</sup> and space<sup>33</sup> that may themselves represent responses to global change. However, in Celtic sea fish within-species shifts have been shown to contribute less to community-level size shifts than changes in species composition<sup>34</sup>. We also note that ‘size’ traits for indeterminately growing plants have a less clear meaning than for animals. However, both seed size and maximum height are linked to environmental variables<sup>35,36</sup> and could therefore be hypothesised to influence species responses to global change.

Many of the criticisms and defences regarding earlier studies using the BioTIME dataset, and indeed other meta-analyses of large collections of time series, also apply to this work<sup>37</sup>. The statistical approach was developed to be as robust as possible to both incomplete trait data and changes in overall abundance and sampling effort through time. However, it must be noted that our largely non-parametric approach could lack the power and resolution to identify subtle changes. Biases in the underlying BioTIME database towards vertebrate taxa and North American and European sites<sup>14</sup> are further exaggerated when crossed with trait data availability (Figure 1b). One particularly concerning gap is the absence of any insect studies due to a paucity of usable trait information. Observations suggest there have been considerable changes in the structure of insect communities<sup>24,38,39</sup>. Developing comprehensive insect trait datasets, including using proxies and data imputation, will be crucial to address this deficit<sup>40–42</sup>.

In conclusion, despite these reservations, this global analysis suggests that cases of relative increases of larger species<sup>24,43</sup> or trait constancy despite declines in abundance<sup>44</sup>, may in fact be as frequent as shifts towards smaller sized species<sup>22</sup>. Community responses may therefore be considerably more nuanced and localised than previously considered based on macroecological expectations<sup>8</sup>.

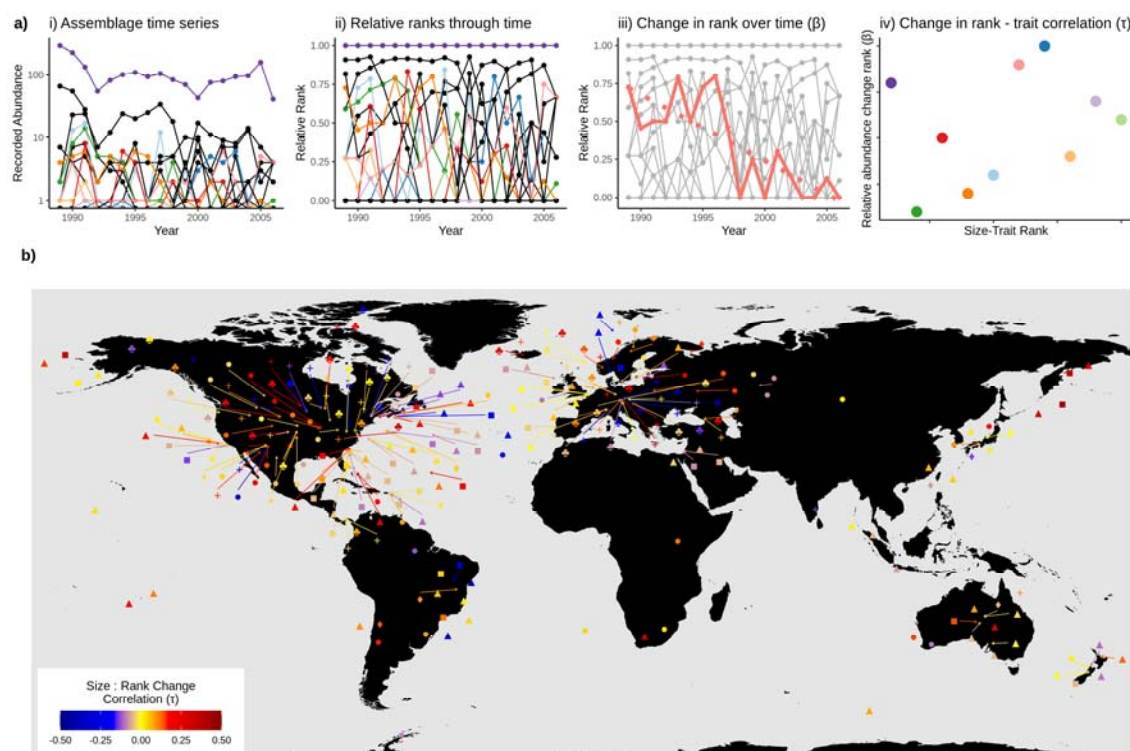

**Figure 1.** a) Example of the non-parametric approach taken to accommodate patchy trait data and possible variation in sampling intensity through time for an arbitrary example assemblage. Here species with trait values are coloured, others without trait data are black. (i) Quantitative survey data is combined to generate assemblage time series. (ii) the relative ranks of each species are calculated for each year, through which is fit a linear model summarising the rate of change ( $\beta$ ) in a species rank through time (iii). For those species where trait data is available, the concordance between body size traits and abundance rank changes (iv) is then summarised by  $\tau$ , the Kendal rank-correlation coefficient (here,  $\tau = 0.24$ ). b) Global distribution of studies, for each tested trait, showing average  $\tau$  for each study-trait combination. Marine: Body length =  $\blacktriangle$ , Marine: Qualitative body size =  $\blacksquare$ , Fish: Maximum length =  $\boxplus$ , Amniotes: Adult body mass =  $\boxtimes$ , Plants: Seed mass =  $+$ , Plants: Maximum height =  $\boxdot$ . Note that the locations are shown as centre point of each study, which can cause oceanic studies to be 'located' on land. See Extended Data Table 4 for full details of study-level results.

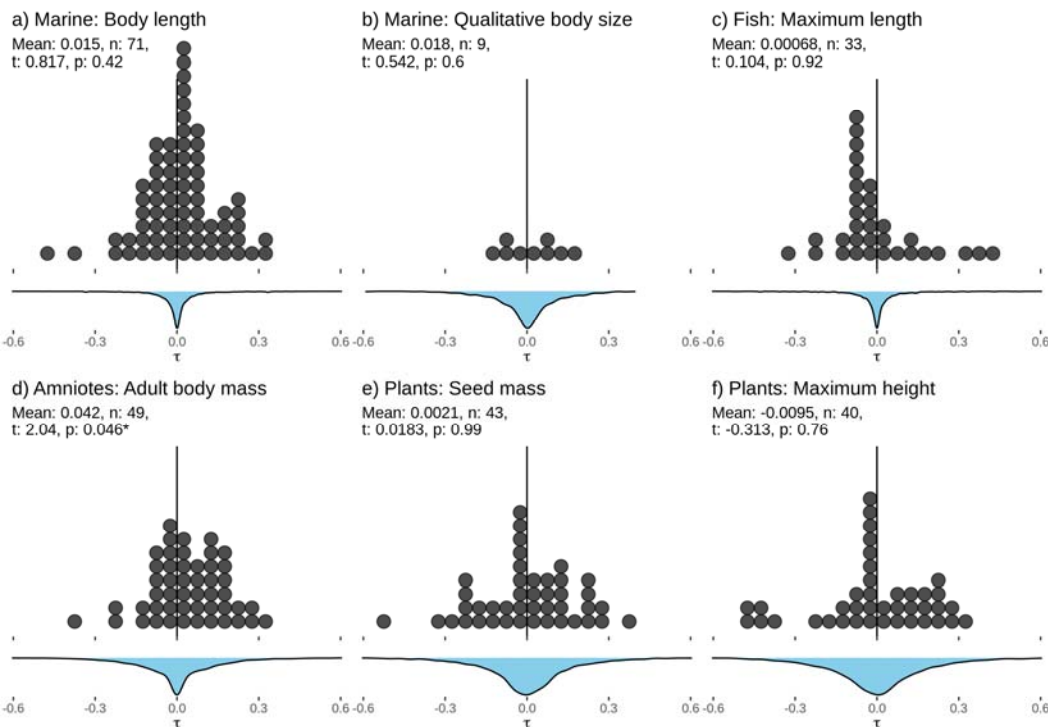

**Figure 2.** Distribution of Kendall's rank correlation coefficient between the 6 tested body-size traits and changes in relative abundance through time ( $\tau$ ). Each dot represents one study, averaging across the constituent assembly time series for studies of large spatial extent. Results are binned into classes 0.05 units of  $\tau$  wide. Blue density plots show the distribution of 50 randomisations of available trait data. Statistical results refer to two-sided two-sample t-tests, comparing the distribution of observed  $\tau$  values to the null distribution. Means shown are for the observed results. Full statistical results are given in Extended Data Table 1.

## Methods

**Generating assemblage time series.** We downloaded all studies available in the ‘open’ component of the BioTIME database of community time series<sup>14</sup> from <https://doi.org/10.5281/zenodo.3265871>. BioTIME contains observations from both fixed plots (repeat measures from the same set of specific localised sites) and from wide ranging surveys and transects that may not necessarily precisely align year-on-year. We followed previous approaches<sup>1</sup> and first identified studies as ‘multi-site’ or ‘single-site’ based on the number of coordinates in the BioTIME database. Single site studies were considered as one combined assemblage, while widely-dispersed ‘multi-site’ studies were portioned into assemblages based on a global hexagonal grid of 96 km<sup>2</sup> cells using *dggridR*<sup>45</sup>. We retained records from assemblages with abundance or biomass data of at least 10 distinct species and at least 5 years between the first and the last record.

**Cleaning Names** Although the majority of the records are identified with binomials to species level, a portion of the records in the BioTIME database are labelled only at higher taxonomic levels. For simplicity, we refer to all distinct names as ‘species’. We identified uninformative labels (for example ‘spA’, ‘unidentified’, ‘Miscellaneous’, ‘larvae’, ‘grass’) and common names (mostly birds) were converted to binomials using the Encyclopaedia of Life tool via the *taxize* R package<sup>46,47</sup> followed by manual inspection based on study location and species distribution where multiple options were presented. We excluded studies where the species are listed using codes. Informative names were standardised against the GBIF name backbone<sup>48</sup> using *taxize*. The dominant kingdom represented in each study was used to distinguish homonyms. Where BioTIME included only a genus level identification, we matched these to genus level trait values listed in trait databases. Where BioTIME only included taxonomic information of higher rank than genus, we did not attempt to match the traits.

**Trait data** We used four separate trait databases that include some measure of organism size, but we did not mix information between databases. *Amniotes*: The life history database was downloaded from <https://doi.org/10.6084/m9.figshare.c.3308127.v1><sup>15</sup> from which we used the ‘adult\_body\_mass\_g’ field. *Plants*: We downloaded from the TRY database (<https://www.try-db.org/>)<sup>17</sup> all records of ‘seed dry mass’ (trait 26) and ‘plant height vegetative’ (trait 3106). We grouped these by accepted species name, and calculated the mean of the log 10 (seedmass) values and the maximum observed height. We did not assign a value when the standard deviation of log 10 (seedmass) values was greater than 1. The resultant dataset was derived from 91 original datasets<sup>51-123</sup>. *Fish*: We downloaded a curated database of fish traits from [https://store.pangaea.de/Publications/Beukhof-etal\\_2019/TraitCollectionFishNATlanticNEPacificContShelf.xlsx](https://store.pangaea.de/Publications/Beukhof-etal_2019/TraitCollectionFishNATlanticNEPacificContShelf.xlsx)<sup>18</sup> which in turn is largely based on data from the FishBase database<sup>19</sup>. It is focussed on the North Atlantic and Pacific continental shelf, but this represents the majority of the relevant BioTIME studies. It includes values for both genus and species level. We used maximum length, and when there were multiple values for a particular species, we took an average. *Marine*: We downloaded size data from the World Register of Marine Species (WoRMS) database<sup>16</sup>. Aphia IDs for all the species in our assemblages (excluding plants and fungi) were identified and used to download all attributes associated with these IDs held on WoRMS using the *worms* R package<sup>49</sup>. Quantitative ‘body size’ measurements of length were scaled to millimetre units. We discarded

values from stages other than adults, values corresponding to minimums or thicknesses, then took a mean, except where the values differed by over an order of magnitude, which we discarded. Qualitative body sizes were divided into four categories (<0.2 mm, 0.2 - 2mm, 2-200 mm, >200 mm), that were carried forwards as simple numbers (1-4). Data not from adults was discarded, and where an ID was associated with multiple distinct size categories, it was discarded.

Summaries of the trait data completeness are given in Extended Data Figure 2. Note that 80 studies had sufficient trait data for analysis under multiple traits - 36 had both categories of plant data, 31 had length data from both WoRMS and the fish-specific database, 7 studies spanned the amniote life history traits and WoRMS database, 5 studies shared both qualitative and quantitative size information from WoRMS, and one study could be related to both traits from WoRMS and the fish database.

**Abundance change – trait correlation.** We assessed each assemblage-trait combination where  $\geq 40\%$  of the species had data for that trait. Within each year, all  $n$  species in the assemblage were assigned relative ranks (1 = highest,  $1/n$  = lowest) by their abundance or biomass depending on the fields available in BioTIME. Ties were averaged and where a species was not observed in a particular year, it was assigned a rank of zero for that year. Where a study included both ‘abundance’ and ‘biomass’ data, we preferentially used the abundance data. Presence absence-data was not used. We fit a linear model through the relative ranks over time of each species in the assemblage. The set of slopes ( $\beta$ ) of these linear models within each dataset summarised the relative change in abundance of each species in the assemblage through time. Very small  $\beta$  values, caused by model fitting errors when there is no change in rank abundance, were set to 0 to avoid spurious rankings. The main response variable ‘ $\tau$ ’ for each assemblage was then computed as Kendall’s rank correlation coefficient between trait values and the set of  $\beta$ s. Species with missing trait values were excluded. The default ‘ $\tau_B$ ’ approach was used for ties<sup>50</sup>. Where there were multiple assemblages per study, study level  $\tau$  was a simple arithmetic mean of all assemblage level  $\tau$  values.

**Statistics** To generate a null model for the impact of traits, the relative abundance rank changes ( $\beta$ s) were computed as above, but the available trait values (including ‘NA’s where trait data was missing) were randomly reassigned to the species in that assemblage and  $\tau$  recalculated. This was repeated 100 times per assemblage to generate a null distribution of expected  $\tau$  values for each study. For each tested trait, we used two-sided Welch’s two-sample t-test to determine if the mean  $\tau$  for that trait was significantly different to this null expectation.

To examine study level determinates of  $\tau$  within each trait, for each study we calculated: 1) the mean total species richness of each assemblage over the time frame, 2) the mean assemblage level trait data completeness, 3) the mean number of years that from which there was data, 4) the mean span of years from which there was data, 5) the number of assemblages within the study (i.e. the spatial extent), 6) the grain size of the study, as listed in the BioTIME metadata, and 7) the absolute latitude of the centre of the study. We fit a set of linear models to assess whether these factors could predict either  $\tau$  or  $\tau^2$ .

## Author contributions

JCDT designed and conducted the analyses and wrote the first draft of the manuscript. All authors contributed to the manuscript development and revision.

## Acknowledgments

This work would be impossible without all the hundreds of researchers who have contributed to the multiple open-access databases and software used. All authors were supported by NERC grant NE/T003510/1 ‘*Mechanisms and prediction of large-scale ecological responses to environmental change*’.

## Code Availability

All analyses were conducted using R. Code and illustrative notebooks to reproduce all steps is available at: [https://github.com/jcdterry/BioTIME\\_BodySize](https://github.com/jcdterry/BioTIME_BodySize) and archived on Zenodo at <https://doi.org/10.5281/zenodo.4745554>

## Data Availability

Original sources of open-source datasets are listed in the methods. Processed data are available with analysis code at: [https://github.com/jcdterry/BioTIME\\_BodySize](https://github.com/jcdterry/BioTIME_BodySize) and archived on Zenodo at <https://doi.org/10.5281/zenodo.4745554>

## References

1. Blowes, S. A. *et al.* The geography of biodiversity change in marine and terrestrial assemblages. *Science* **366**, 339–345 (2019).
2. Dornelas, M. *et al.* Assemblage time series reveal biodiversity change but not systematic loss. *Science* **344**, 296–299 (2014).
3. Dornelas, M. *et al.* A balance of winners and losers in the Anthropocene. *Ecology Letters* **22**, 847–854 (2019).
4. Vellend, M. *et al.* Global meta-analysis reveals no net change in local-scale plant biodiversity over time. *Proceedings of the National Academy of Sciences* **110**, 19456–19459 (2013).
5. Peters, R. H. *The Ecological Implications of Body Size*. (Cambridge University Press, 1983).
6. Brown, J. H., Gillooly, J. F., Allen, A. P., Savage, V. M. & West, G. B. Toward a Metabolic Theory of Ecology. *Ecology* **85**, 1771–1789 (2004).
7. Yvon-Durocher, G., Montoya, J. M., Trimmer, M. & Woodward, G. Warming alters the size spectrum and shifts the distribution of biomass in freshwater ecosystems. *Global Change Biology* **17**, 1681–1694 (2011).
8. Daufresne, M., Lengfellner, K. & Sommer, U. Global warming benefits the small in aquatic ecosystems. *Proceedings of the National Academy of Sciences of the United States of America* **106**, 12788–12793 (2009).
9. Smith, F. A., Elliott Smith, R. E., Lyons, S. K. & Payne, J. L. Body size downgrading of mammals over the late Quaternary. *Science* **360**, 310–313 (2018).



- 232 10. Sallan, L. & Galimberti, A. K. Body-size reduction in vertebrates following the end-Devonian mass  
233 extinction. *Science* **350**, 812–815 (2015).
- 234 11. Leung, B. *et al.* Clustered versus catastrophic global vertebrate declines. *Nature* **588**, 267–271 (2020).
- 235 12. Ripple, W. J. *et al.* Extinction risk is most acute for the world’s largest and smallest vertebrates.  
236 *Proceedings of the National Academy of Sciences of the United States of America* **114**, 10678–10683  
237 (2017).
- 238 13. Cardillo, M. *et al.* Evolution: Multiple causes of high extinction risk in large mammal species. *Science*  
239 **309**, 1239–1241 (2005).
- 240 14. Dornelas, M. *et al.* BioTIME: A database of biodiversity time series for the Anthropocene. *Global*  
241 *Ecology and Biogeography* **27**, 760–786 (2018).
- 242 15. Myhrvold, N. P. *et al.* An amniote life-history database to perform comparative analyses with birds,  
243 mammals, and reptiles. *Ecology* **96**, 3109–000 (2015).
- 244 16. Horton, T. *et al.* World Register of Marine Species (WoRMS). (2020).
- 245 17. Kattge, J. *et al.* TRY plant trait database – enhanced coverage and open access. *Global Change Biology*  
246 **26**, 119–188 (2020).
- 247 18. Beukhof, E., Dencker, T. S., Palomares, M. L. D. & Maureaud, A. A trait collection of marine fish species  
248 from North Atlantic and Northeast Pacific continental shelf seas. *Pangaea* 1–12 (2019).
- 249 19. Froese, R. & Pauly, D. FishBase. [www.fishbase.org](http://www.fishbase.org) (2019).
- 250 20. Antão, L. H. *et al.* Temperature-related biodiversity change across temperate marine and terrestrial  
251 systems. *Nature Ecology and Evolution* **4**, 927–933 (2020).
- 252 21. Estes, J. A. *et al.* Trophic downgrading of planet earth. *Science* **333**, 301–306 (2011).
- 253 22. Morán, X. A. G., López-Urrutia, Á., Calvo-Díaz, A. & Li, W. K. W. Increasing importance of small  
254 phytoplankton in a warmer ocean. *Global Change Biology* **16**, 1137–1144 (2010).
- 255 23. Santini, L. & Isaac, N. J. B. Rapid Anthropocene realignment of allometric scaling rules. *Ecology Letters*  
256 **ele.13743** (2021) doi:10.1111/ele.13743.
- 257 24. Merckx, T. *et al.* Body-size shifts in aquatic and terrestrial urban communities. *Nature* **558**, 113–116  
258 (2018).
- 259 25. McCauley, D. J. *et al.* Marine defaunation: Animal loss in the global ocean. *Science* **347**, (2015).
- 260 26. Branch, T. A. *et al.* The trophic fingerprint of marine fisheries. *Nature* **468**, 431–435 (2010).
- 261 27. Greenstreet, S. P. R. *et al.* Development of the EcoQO for the North Sea fish community. *ICES Journal of*  
262 *Marine Science* **68**, 1–11 (2011).
- 263 28. Beukhof, E., Dencker, T., Pecuchet, L. & Lindegren, M. Spatio-temporal variation in marine fish traits  
264 reveals community-wide responses to environmental change. *Marine Ecology Progress Series* **610**,  
265 205–222 (2019).
- 266 29. OSPAR. *Proportion of Large Fish (Large Fish Index) Intermediate Assessments*.  
267 [https://oap.ospar.org/en/ospar-assessments/intermediate-assessment-2017/biodiversity-status/fish-](https://oap.ospar.org/en/ospar-assessments/intermediate-assessment-2017/biodiversity-status/fish-and-food-webs/proportion-large-fish-large-fish-index/)  
268 [and-food-webs/proportion-large-fish-large-fish-index/](https://oap.ospar.org/en/ospar-assessments/intermediate-assessment-2017/biodiversity-status/fish-and-food-webs/proportion-large-fish-large-fish-index/) (2017).
- 269 30. Gardner, J. L., Peters, A., Kearney, M. R., Joseph, L. & Heinsohn, R. Declining body size: A third universal  
270 response to warming? *Trends in Ecology and Evolution* **26**, 285–291 (2011).

- 271 31. Forster, J., Hirst, A. G. & Atkinson, D. Warming-induced reductions in body size are greater in aquatic  
272 than terrestrial species. *Proceedings of the National Academy of Sciences of the United States of*  
273 *America* **109**, 19310–19314 (2012).
- 274 32. Sheridan, J. A. & Bickford, D. Shrinking body size as an ecological response to climate change. *Nature*  
275 *Climate Change* **1**, 401–406 (2011).
- 276 33. Violle, C. *et al.* The return of the variance: Intraspecific variability in community ecology. *Trends in*  
277 *Ecology and Evolution* **27**, 244–252 (2012).
- 278 34. Shephard, S. *et al.* Size-selective fishing drives species composition in the Celtic Sea. *ICES Journal of*  
279 *Marine Science* **69**, 223–234 (2012).
- 280 35. Moles, A. T. *et al.* Global patterns in plant height. *Journal of Ecology* **97**, 923–932 (2009).
- 281 36. Moles, A. T. *et al.* Global patterns in seed size. *Global Ecology and Biogeography* **16**, 109–116 (2006).
- 282 37. Vellend, M. *et al.* Estimates of local biodiversity change over time stand up to scrutiny. *Ecology* **98**,  
283 583–590 (2017).
- 284 38. Janzen, D. H. & Hallwachs, W. To us insectometers, it is clear that insect decline in our Costa Rican  
285 tropics is real, so let's be kind to the survivors. *Proceedings of the National Academy of Sciences of the*  
286 *United States of America* **118**, 1–8 (2021).
- 287 39. MacGregor, C., Williams, J., Bell, J. & Thomas, C. Moth biomass increases and decreases over 50 years  
288 in Britain. *Nature Ecology and Evolution* (2019) doi:10.1038/s41559-019-1028-6.
- 289 40. Kinsella, R. S. *et al.* Unlocking the potential of historical abundance datasets to study biomass change  
290 in flying insects. *Ecology and Evolution* **10**, 8394–8404 (2020).
- 291 41. Johnson, T. F., Isaac, N. J. B., Paviolo, A. & González-Suárez, M. Handling missing values in trait data.  
292 *Global Ecology and Biogeography* **30**, 51–62 (2021).
- 293 42. Middleton-Welling, J. *et al.* A new comprehensive trait database of European Butterflies (Papilionidae).  
294 *Scientific Data* 1–10 (2020) doi:10.1038/s41597-020-00697-7.
- 295 43. O'Gorman, E. J. *et al.* Unexpected changes in community size structure in a natural warming  
296 experiment. *Nature Climate Change* **7**, 659–663 (2017).
- 297 44. Schipper, A. M. *et al.* Contrasting changes in the abundance and diversity of North American bird  
298 assemblages from 1971 to 2010. *Global Change Biology* **22**, 3948–3959 (2016).
- 299 45. Barnes, R. dggridR: Discrete Global Grids. (2020).
- 300 46. Chamberlain, S. A. & Szöcs, E. Taxize: Taxonomic search and retrieval in R. *F1000Research* **2**, 1–30  
301 (2013).
- 302 47. Chamberlain, S. *et al.* taxize: Taxonomic information from around the web. (2020).
- 303 48. GBIF Secretariat. GBIF Backbone Taxonomy. (2021) doi:10.15468/39omei.
- 304 49. Chamberlain, S. worrms: World Register of Marine Species (WoRMS) Client. (2020).
- 305 50. Kendall, M. G. The treatment of ties in ranking problems. *Biometrika* **33**, 239–251 (1945).

# 307 Additional data references

308

51. Adler P. B., D. G. Milchunas, W. K. Lauenroth, O. E. Sala and I. C. Burke (2004) Functional traits of graminoids in semi-arid steppes: a test of grazing histories. *Journal of Applied Ecology* 2004 41, 653–663
52. Auger, S., Shipley, B. (2012). : Interspecific and intraspecific trait variation along short environmental gradients in an old-growth temperate forest. *Journal of Vegetation Science*. DOI: 1111/j.1654-1103.2012.01473.x
53. Baraloto, C., C. E. T. Paine, L. Poorter, J. Beauchene, D. Bonal, A.-M. Domenach, B. Herault, S. Patino, J.-C. Roggy, and J. Chave. 2010. Decoupled leaf and stem economics in rainforest trees. *Ecology Letters* 13:1338-1347
54. Bocanegra-Gonzalez KT, Fernandez-Mendez F, Galvis-Jimenez, JF. (in press) Determinación de la resiliencia en bosques secundarios húmedos tropicales a través de la diversidad funcional de árboles en la región del Bajo Calima, Buenaventura, Colombia.
55. Bond-Lamberty, B., C. Wang, and S. T. Gower (2002), Above- and belowground biomass and sapwood area allometric equations for six boreal tree species of northern Manitoba, *Can. J. For. Res.*, 32(8), 1441-1450.
56. Bragazza L (2009) Conservation priority of Italian alpine habitats: a floristic approach based on potential distribution of vascular plant species. *Biodiversity and Conservation* 18: 2823–2835.
57. Brendan Choat, Steven Jansen, Tim J. Brodribb, Herve Cochard, Sylvain Delzon, Radika Bhaskar, Sandra J. Bucci, Taylor S. Feild, Sean M. Gleason, Uwe G. Hacke, Anna L. Jacobsen, Frederic Lens, Hafiz Maherali, Jordi Martinez-Vilalta, Stefan Mayr, Maurizio Mencuccini, Patrick J. Mitchell, Andrea Nardini, Jarmila Pittermann, R. Brandon Pratt, John S. Sperry, Mark Westoby, Ian J. Wright & Amy E. Zanne (2012) Global convergence in the vulnerability of forests to drought. *Nature* 491:752-755  
doi:10.1038/nature11688
58. Burrascano S, Copiz R, Del Vico E, Fagiani S, Giarrizzo E, Mei M, Mortelliti A, Sabatini FM, Blasi C (2015) Wild boar rooting intensity determines shifts in understorey composition and functional traits. *COMMUNITY ECOLOGY* 16(2) 244-253 DOI: 10.1556/168.2015.16.2.12
59. Butterfield, B.J. and J.M. Briggs. 2011. Regeneration niche differentiates functional strategies of desert woody plant species. *Oecologia*, 165:477-487.
60. Cadotte, M. W. 2017. Functional traits explain ecosystem function through opposing mechanisms. *Ecology Letters* 20:989-996
61. Campetella, G; Botta-Dukát, Z; Wellstein, C; Canullo, R; Gatto, S; Chelli, S; Mucina, L; Bartha, S (2011): Patterns of plant trait-environment relationships along a forest succession chronosequence. *Agriculture, Ecosystems & Environment*, 145(1), 38-48. doi:10.1016/j.agee.2011.06.025
62. Carswell, F. E., Meir, P., Wandelli, E. V., Bonates, L. C. M., Kruijt, B., Barbosa, E. M., Nobre, A. D. & Jarvis, P. G. 2000 Photosynthetic capacity in a central Amazonian rain forest. *Tree physiology*. 20, 3, p. 179-186 8 p.
63. Cavender-Bares, J., A. Keen, and B. Miles. 2006. Phylogenetic structure of floridian plant communities depends on taxonomic and spatial scale. *Ecology* 87:S109-S122.

64. Chacón-Madrigal, E., Wanek, W., Hietz, P., & S. Dullinger. 2018. Traits indicating a conservative resource strategy are weakly related to narrow range size in a group of neotropical trees. *Perspectives in Plant Ecology, Evolution, and Systematics*, <https://doi.org/10.1016/j.ppees.2018.01.003>
65. Ciocarlan V. (2009). The illustrated Flora of Romania. Pteridophyta et Spermatopyta. Editura Ceres, 1141 p (in Romanian).
66. Cornelissen, J. H. C. 1996. An experimental comparison of leaf decomposition rates in a wide range of temperate plant species and types. *Journal of Ecology* 84:573-582.
67. Cornelissen, J. H. C., B. Cerabolini, P. Castro-Diez, P. Villar-Salvador, G. Montserrat-Marti, J. P. Puyravaud, M. Maestro, M. J. A. Werger, and R. Aerts. 2003. Functional traits of woody plants: correspondence of species rankings between field adults and laboratory-grown seedlings? *Journal of Vegetation Science* 14:311-322.
68. Cornelissen, J. H. C., P. C. Diez, and R. Hunt. 1996. Seedling growth, allocation and leaf attributes in a wide range of woody plant species and types. *Journal of Ecology* 84:755-765.
69. Díaz, S., J. G. Hodgson, K. Thompson, M. Cabido, J. H. C. Cornelissen, A. Jalili, G. Montserrat-Martí, J. P. Grime, F. Zarrinkamar, Y. Asri, S. R. Band, S. Basconcelo, P. Castro-Díez, G. Funes, B. Hamzehee, M. Khoshnevi, N. Pérez-Harguindeguy, M. C. Pérez-Rontomé, F. A. Shirvany, F. Vendramini, S. Yazdani, R. Abbas-Azimi, A. Bogaard, S. Boustani, M. Charles, M. Dehghan, L. de Torres-Espuny, V. Falczuk, J. Guerrero-Campo, A. Hynd, G. Jones, E. Kowsary, F. Kazemi-Saeed, M. Maestro-Martínez, A. Romo-Díez, S. Shaw, B. Siavash, P. Villar-Salvador, and M. R. Zak. 2004. The plant traits that drive ecosystems: Evidence from three continents. *Journal of Vegetation Science* 15:295-304.
70. Everwand G, Fry, EL, Eggers T, Manning P (2014) Seasonal variation in the relationship between plant traits and grassland carbon and water fluxes. *Ecosystems* 17, 1095-1108
71. Falster DS, Remko A. Duursma, Masae I. Ishihara, Diego R. Barneche, Richard G. FitzJohn, Angelica Våhammar, Masahiro Aiba, Makoto Ando, Niels Anten, Michael J. Aspinwall, Jennifer L. Baltzer, Christopher Baraloto, Michael Battaglia, John J. Battles, Ben Bond-Lamberty, Michiel van Breugel, James Camac, Yves Claveau, Lluís Coll, Masako Dannoura, Sylvain Delagrange, Jean-Christophe Domec, Farrah Fatemi, Wang Feng, Veronica Gargaglione, Yoshiaki Goto, Akio Hagihara, Jefferson S. Hall, Steve Hamilton, Degi Harja, Tsutomu Hiura, Robert Holdaway, Lindsay B. Hutley, Tomoaki Ichie, Eric J. Jokela, Anu Kantola, Jeff W. G. Kelly, Tanaka Kenzo, David King, Brian D. Kloeppel, Takashi Kohyama, Akira Komiyama, Jean-Paul Laclau, Christopher H. Lusk, Douglas A. Maguire, Guerric le Maire, Annikki Mäkelä, Lars Markesteijn, John Marshall, Katherine McCulloh, Itsuo Miyata, Karel Mokany, Shigeta Mori, Randall W. Myer, Masahiro Nagano, Shawna L. Naidu, Yann Nouvellon, Anthony P. OGrady, Kevin L. O'Hara, Toshiyuki Ohtsuka, Noriyuki Osada, Olusegun O. Osunkoya, Pablo Luis Peri, Any Mary Petritan, Lourens Poorter, Angelika Portsmouth, Catherine Potvin, Johannes Ransijn, Douglas Reid, Sabina C. Ribeiro, Scott D. Roberts, Rolando Rodríguez, Angela Saldaña-Acosta, Ignacio Santa-Regina, Kaichiro Sasa, N. Galia Selaya, Stephen C. Sillett, Frank Sterck, Kentaro Takagi, Takeshi Tange, Hiroyuki Tanouchi, David Tissue, Toru Umehara, Hajime Utsugi, Matthew A. Vadeboncoeur, Fernando Valladares, Petteri Vanninen, Jian R. Wang, Elizabeth Wenk, Richard Williams, Fabiano de Aquino

- Ximenes, Atsushi Yamaba, Toshihiro Yamada, Takuo Yamakura, Ruth D. Yanai, and Robert A. York. 2015. BAAD: a biomass and allometry database for woody plants. Ecology 96:1445. <http://dx.doi.org/10.1890/14-1889.1>
72. Fitter, A. H. and H. J. Peat 1994. The Ecological Flora Database. Journal of Ecology 82:415-425.
73. Fonseca, C. R., J. M. Overton, B. Collins, and M. Westoby. 2000. Shifts in trait-combinations along rainfall and phosphorus gradients. Journal of Ecology 88:964-977.
74. Frenette-Dussault, C., Shipley, B., Léger, J.F., Meziane, D. & Hingrat, Y. (2012). Functional structure of an arid steppe plant community reveals similarities with Grime's C-S-R theory. Journal of Vegetation Science 23: 208-222.
75. Giarrizzo E., Burrascano S., Chiti T., de Bello F., Leps J., Zavattero L., Blasi C. (2017) Re-visiting historical semi-natural grasslands in the Apennines to assess patterns of changes in plant species composition and functional traits. Applied Vegetation Science 20(2):247-258, doi: 10.1111/avsc.12288
76. Green, W. 2009. USDA PLANTS Compilation, version 1, 09-02-02. (<http://bricol.net/downloads/data/PLANTSdatabase/>) NRCS: The PLANTS Database (<http://plants.usda.gov>, 1 Feb 2009). National Plant Data Center: Baton Rouge, LA 70874-74490 USA.
77. Gutiérrez AG, & Huth A (2012) Successional stages of primary temperate rainforests of Chiloé Island, Chile. Perspectives in plant ecology, systematics and evolution. 14: 243– 256
78. Herz, K., Dietz, S., Haider, S., Jandt, U., Scheel, D. & Bruehlheide, H. (2017): Drivers of intraspecific trait variation of grass and forb species in German meadows and pastures. – Journal of Vegetation Science 28: 705–716. Doi: 10.1111/jvs.12534. Herz, K., Dietz, S., Haider, S., Jandt, U., Scheel, D. & Bruehlheide, H. (2017): Predicting individual plant performance in grasslands. – Ecology and Evolution 7: 8958–8965. DOI: 10.1002/ece3.3393
79. HILL, M.O., PRESTON, C.D. & ROY, D.B. (2004) PLANTATT - attributes of British and Irish Plants: status, size, life history, geography and habitats. Huntingdon: Centre for Ecology and Hydrology.
80. J. Fagúndez & J. Izco 2008. Seed morphology of two distinct species of Erica L. (Ericaceae). Acta Botanica Malacitana 33: 1-9
81. Kattge, J., W. Knorr, T. Raddatz, and C. Wirth. 2009. Quantifying photosynthetic capacity and its relationship to leaf nitrogen content for global-scale terrestrial biosphere models. Global Change Biology 15:976-991.
82. Kleyer, M., R. M. Bekker, I. C. Knevel, J. P. Bakker, K. Thompson, M. Sonnenschein, P. Poschlod, J. M. van Groenendael, L. Klimes, J. Klimesova, S. Klotz, G. M. Rusch, Hermy, M. , D. Adriaens, G. Boedeltje, B. Bossuyt, A. Dannemann, P. Endels, L. Götzenberger, J. G. Hodgson, A.-K. Jackel, I. Kühn, D. Kunzmann, W. A. Ozinga, C. Römermann, M. Stadler, J. Schlegelmilch, H. J. Steendam, O. Tackenberg, B. Wilmann, J. H. C. Cornelissen, O. Eriksson, E. Garnier, and B. Peco. 2008. The LEDA Traitbase: a database of life-history traits of the Northwest European flora. Journal of Ecology 96:1266-1274.
83. Kühn, I., W. Durka, and S. Klotz. 2004. BioFlor - a new plant-trait database as a tool for plant invasion ecology. Diversity and Distribution 10 363-365.

84. Laughlin, D.C., P.Z. Fulé, D.W. Huffman, J. Crouse, and E. Laliberte. 2011. Climatic constraints on trait-based forest assembly. *Journal of Ecology* 99:1489-1499.
85. Li, Y. and Shipley, B. (2018) Community divergence and convergence along experimental gradients of stress and disturbance. *Ecology*, 99: 775-781. doi:10.1002/ecy.2162
86. Liebergesell M, Reu B, Stahl U, Freiberg M, Welk E, Kattge J, Cornelissen JHC, Penuelas J, Wirth C (2016) Functional Resilience against Climate-Driven Extinctions - Comparing the Functional Diversity of European and North American Tree Floras. *PLoS ONE* 11(2): e0148607. doi:10.1371/journal.pone.0148607
87. Lin Y-S, Medlyn BE, Duursma RA, Prentice IC, Wang H, Baig S, Eamus D, De Dios VR, Mitchell P, Ellsworth DS, De Beeck MO, Wallin G, Uddling J, Tarvainen L, Linderson M-L, Cernusak LA, Nippert JB, Ocheltree TW, Tissue DT, Martin-StPaul NK, Rogers A, Warren JM, De Angelis P, Hikosaka K, Han Q, Onoda Y, Gimeno TE, Barton CVM, Bennie J, Bonal D, Bosc A, Löw M, Macinins-Ng C, Rey A, Rowland L, Setterfield SA, Tausz-Posch S, Zaragoza-Castells J, Broadmeadow MSJ, Drake JE, Freeman M, Ghannoum O, Hutley LB, Kelly JW, Kikuzawa K, Kolari P, Koyama K, Limousin J-M, Meir P, Da Costa ACL, Mikkelsen TN, Salinas N, Sun W, Wingate L, (2015) Optimal stomatal behaviour around the world. *Nature Climate Change* 5(5): 459-464 DOI: 10.1038/NCLIMATE2550
88. Louault, F., V. D. Pillar, J. Aufrere, E. Garnier, and J. F. Soussana. 2005. Plant traits and functional types in response to reduced disturbance in a semi-natural grassland. *Journal of Vegetation Science* 16:151-160.
89. Manning, Houston and Evans 2009 *Basic and Applied Ecology* 10, 300-308
90. Marco Moretti and Colin Legg (2009) Combining plant and animal traits to assess community functional responses to disturbance. *Ecography* 32: 299-309. doi: 10.1111/j.1600-0587.2008.05524.x
91. Medlyn, B. E., F.-W. Badeck, D. G. G. De Pury, C. V. M. Barton, M. Broadmeadow, R. Ceulemans, P. De Angelis, M. Forstreuter, M. E. Jach, S. Kellomäki, E. Laitat, M. Marek, S. Philippot, A. Rey, J. Strassmeyer, K. Laitinen, R. Liozon, B. Portier, P. Roberntz, K. Wang, and P. G. Jarvis. 1999. Effects of elevated CO<sub>2</sub> on photosynthesis in European forest species: a meta-analysis of model parameters. *Plant, Cell and Environment* 22:1475-1495.
92. MENCUCCINI M., 2003. The ecological significance of long distance water transport: short-term regulation and long-term acclimation across plant growth forms. *Plant, Cell and Environment*, 26:163-182.
93. Milla & Reich 2011 *Annals of Botany* 107: 455–465, 2011.
94. Miller JED, Ives AR, Harrison SP, Damschen EI (2018) Early and late flowering guilds respond differently to landscape spatial structure. *J Ecol.* 106:1033–1045. <https://doi.org/10.1111/1365-2745.12849>
95. Moles, A. T., D. S. Falster, M. R. Leishman, and M. Westoby. 2004. Small-seeded species produce more seeds per square metre of canopy per year, but not per individual per lifetime. *Journal of Ecology* 92:384-396.

96. Ordonez, J. C., P. M. van Bodegom, J. P. M. Witte, R. P. Bartholomeus, J. R. van Hal, and R. Aerts. 2010. Plant Strategies in Relation to Resource Supply in Mesic to Wet Environments: Does Theory Mirror Nature? *American Naturalist* 175:225-239.
97. Pahl, A.T., Kollmann, J., Mayer, A. & Haider, S. (2013): No evidence for local adaptation in an invasive alien plant: field and greenhouse experiments tracing a colonization sequence. *Annals of Botany* 112 (9): 1921-1930. DOI: 10.1093/aob/mct246
98. Paine CET, Amissah L, Auge H, Baraloto C, Baruffol M, Bourland N, Bruelheide H, Dainou K, de Gouvenain RC, Doucet J-L, Doust SJ, Fine PV a, Fortunel C, Haase J, Holl KD, Jactel H, Li X, Kitajima K, Koricheva J, Martinez-Garza C, Messier C, Paquette A, Philipson CD, Piotta D, Poorter L, Posada JM, Potvin C, Rainio K, Russo SE, Ruiz-Jaen M, Scherer-Lorenzen M, Webb CO, Zahawi RA & Hector A (2015) Globally, functional traits are weak predictors of juvenile tree growth, and we do not know why. *Journal of Ecology*, 103, 978–989. DOI: 10.1111/1365-2745.12401
99. Paula, S., M. Arianoutsou, D. Kazanis, Ç. Tavsanoğlu, F. Lloret, C. Buhk, F. Ojeda, B. Luna, J. M. Moreno, A. Rodrigo, J. M. Espelta, S. Palacio, B. Fernández-Santos, P. M. Fernandes, and J. G. Pausas. 2009. Fire-related traits for plant species of the Mediterranean Basin. *Ecology* 90:1420.
100. Peco B., de Pablos I., Traba J., & Levassor C. (2005) The effect of grazing abandonment on species composition and functional traits: the case of dehesa *Basic and Applied Ecology*, 6(2): 175-183
101. Prentice, I.C., Meng, T., Wang, H., Harrison, S.P., Ni, J., Wang, G., 2011. Evidence for a universal scaling relationship of leaf CO<sub>2</sub> drawdown along a moisture gradient. *New Phytologist* 190: 169–180
102. Preston, K. A., W. K. Cornwell, and J. L. DeNoyer. 2006. Wood density and vessel traits as distinct correlates of ecological strategy in 51 California coast range angiosperms. *New Phytologist* 170:807-818.
103. Quested, H. M., J. H. C. Cornelissen, M. C. Press, T. V. Callaghan, R. Aerts, F. Trosien, P. Riemann, D. Gwynn-Jones, A. Kondratyuk, and S. E. Jonasson. 2003. Decomposition of sub-arctic plants with differing nitrogen economies: A functional role for hemiparasites. *Ecology* 84:3209-3221.
104. Rodrigues, A.V.; Bones, F.L.V.; Schneiders, A.; Oliveira, L.Z.; Vibrans, A.C.; Gasper, A.L. Plant Trait Dataset for Tree-Like Growth Forms Species of the Subtropical Atlantic Rain Forest in Brazil. Data 2018, 3, 16.
105. Royal Botanical Gardens KEW. 2008. Seed Information Database (SID). Version 7.1. Available from: <http://data.kew.org/sid/> (May 2008).
106. Sandel, B., J. D. Corbin, and M. Krupa. 2011. Using plant functional traits to guide restoration: a case study in California coastal grassland. *Ecosphere* 2(2):art23. doi:10.1890/ES10-00175.1
107. Schweingruber, F.H., Landolt, W.: The Xylem Database. Swiss Federal Research Institute WSL Updated (2005)
108. Shiodera, S., J. S. Rahajoe, and T. Kohyama. 2008. Variation in longevity and traits of leaves among co-occurring understorey plants in a tropical montane forest. *Journal of Tropical Ecology* 24:121-133.

109. Shipley, B. and M. Parent. 1991. Germination Responses of 64 Wetland Species in Relation to Seed Size, Minimum Time to Reproduction and Seedling Relative Growth-Rate. *Functional Ecology* 5:111-118.
110. Smith, N. G. and Dukes, J. S. (2017), LCE: leaf carbon exchange data set for tropical, temperate, and boreal species of North and Central America. *Ecology*, 98: 2978. doi:10.1002/ecy.1992
111. Sophie Gachet, Errol Véla, Thierry Tatoni, 2005, BASECO: a floristic and ecological database of Mediterranean French flora. *Biodiversity and Conservation* 14(4):1023-1034
112. Spasojevic, M. J. and K. N. Suding. 2012. Inferring community assembly mechanisms from functional diversity patterns: the importance of multiple assembly processes. *Journal of Ecology* 100:652-661.
113. Swaine, E. K. 2007. Ecological and evolutionary drivers of plant community assembly in a Bornean rain forest. PhD Thesis, University of Aberdeen, Aberdeen.
114. Thuiller W - Traits of European Alpine Flora - Wilfried Thuiller - OriginAlps Project - Centre National de la Recherche Scientifique
115. Von Holle, B. and D. Simberloff. 2004. Testing Fox's assembly rule: Does plant invasion depend on recipient community structure? *Oikos* 105:551-563.
116. Williams, M., Y.E. Shimabokuro and E.B. Rastetter. 2012. LBA-ECO CD-09 Soil and Vegetation Characteristics, Tapajos National Forest, Brazil. Data set. Available on-line [<http://daac.ornl.gov>] from Oak Ridge National Laboratory Distributed Active Archive Center, Oak Ridge, Tennessee, U.S.A. <http://dx.doi.org/10.3334/ORNLDAAAC/1104>
117. Wirth, C. and J. W. Lichstein. 2009. The Imprint of Species Turnover on Old-Growth Forest Carbon Balances - Insights From a Trait-Based Model of Forest Dynamics. Pages 81-113 in C. Wirth, G. Gleixner, and M. Heimann, editors. *Old-Growth Forests: Function, Fate and Value*. Springer, New York, Berlin, Heidelberg.
118. Wright JP, Sutton-Grier A (2012) Does the leaf economic spectrum hold within local species pools across varying environmental conditions? *Functional Ecology* 2012 doi: 10.1111/1365-2435.12001
119. Wright, J. J., D. D. Ackerly, F. Bongers, K. E. Harms, G. Ibarra-Manriquez, M. Martinez-Ramos, S. J. Mazer, H. C. Muller-Landau, H. Paz, N. C. A. Pitman, L. Poorter, M. R. Silman, C. F. Vriesendorp, C. O. Webb, M. Westoby, and S. J. Wright. 2007. Relationships among ecologically important dimensions of plant trait variation in seven Neotropical forests. *Annals of Botany* 99:1003-1015.
120. Wright, J. J., P. B. Reich, M. Westoby, D. D. Ackerly, Z. Baruch, F. Bongers, J. Cavender-Bares, T. Chapin, J. H. C. Cornelissen, M. Diemer, J. Flexas, E. Garnier, P. K. Groom, J. Gulias, K. Hikosaka, B. B. Lamont, T. Lee, W. Lee, C. Lusk, J. J. Midgley, M. L. Navas, U. Niinemets, J. Oleksyn, N. Osada, H. Poorter, P. Poot, L. Prior, V. I. Pyankov, C. Roumet, S. C. Thomas, M. G. Tjoelker, E. J. Veneklaas, and R. Villar. 2004. The worldwide leaf economics spectrum. *Nature* 428:821-827.
121. Wright, S. J., K. Kitajima, N. J. B. Kraft, P. B. Reich, J. J. Wright, D. E. Bunker, R. Condit, J. W. Dalling, S. J. Davies, S. Díaz, B. M. J. Engelbrecht, K. E. Harms, S. P. Hubbell, C. O. Marks, M. C. Ruiz-Jaen, C. M. Salvador, and A. E. Zanne. 2011. Functional traits and the growth-mortality tradeoff in tropical trees. *Ecology* 91:3664-3674.



- 533 122. Zheng, W. 1983. *Silva Sinica*: Volume 1-4. China Forestry Publishing House, Beijing.
- 534
- 535 123. Unpublished datasets provided by TRY from M. Abedi, B. Amiaud, W. Bond, F. Chapin, E. Forey,
- 536 N. Gross, A. Günther, M. Harzé, B. Hawkins, T. He, H. Jactel, K. Kramer, V. Lanta, M. Leishman,
- 537 F. Lenti, B. Shipley, A. Totte, F. Valladares, and J. Wright
